# Supplementary material
Source: Springer Nature journal article supplement (https://www.springermedizin.de/resource/supplementary/12965_2011_94_MOESM2_ESM.pdf/9573092)
Supplement: MOESM2 [file 9573092]

## Forward primer

## Probe

|            |            |            |            |            |            |            |
|------------|------------|------------|------------|------------|------------|------------|
| AY233272.1 | CTACGGCGTG | CAGTGCTTCT | CACGCTACCC | CGATCACATG | AAGCAGCACG | ACTTCTTCAA |
| AB255038.1 | .....      | .....      | .....      | .....      | .....      | .....      |
| AY533824.1 | .....      | .....      | .....      | .....      | .....      | .....      |
| EF441290.1 | .....      | .....G     | .C.        | .....C.    | .....      | .....      |
| X83959.1   | T..T..T..T | ..A.....   | ..A.A..... | A.....T... | ..A.....T. | ....T..... |
| AF302837.1 | G..T..TC.T | ..A.....TG | .GA.A..... | A.....T... | ..A.....T. | ....T..... |

## Reverse primer

|            |            |            |            |            |    |
|------------|------------|------------|------------|------------|----|
| AY233272.1 | GAGCGCCATG | CCTGAGGGCT | ACATCCAGGA | GCGCACCATC | TT |
| AB255038.1 | .....      | .....      | .....      | .....      | .. |
| AY533824.1 | .....      | .....      | .....      | .....      | .. |
| EF441290.1 | .TC.....   | ..C..A.... | ..G.....   | .....      | .. |
| X83959.1   | ...T.....  | ..C..A..T. | .TG.A..... | AA.A..T..A | .. |
| AF302837.1 | ...T.....  | ..C..A..T. | .TG.A..... | AA.A..T..A | .. |
